# Supplementary material
Source: PubMed Central journal article supplement (PMC8390388)
Supplement: mmc1.pdf [file mmc1.pdf]

# THE LANCET

## Rheumatology

### Supplementary appendix

This appendix formed part of the original submission and has been peer reviewed. We post it as supplied by the authors.

Supplement to: Mahil S K, Bechman K, Raharja A, et al. The effect of methotrexate and targeted immunosuppression on humoral and cellular immune responses to the COVID-19 vaccine BNT162b2: a cohort study. *Lancet Rheumatol* 2021; published online July 8. [https://doi.org/10.1016/S2665-9913\(21\)00212-5](https://doi.org/10.1016/S2665-9913(21)00212-5).

## **Appendix**

**Section A: Supplementary Methods**

**Section B: Supplementary Tables**

**Section C: Supplementary Figures**

## **Section A: Supplementary Methods**

### **Humoral immunogenicity assays**

Seroconversion was assessed using enzyme-linked immunosorbent assays (ELISA) as previously described<sup>1</sup>. Briefly, high-binding ELISA plates (Corning, 3690) were coated overnight at 4°C or for 2 hours at 37 °C with antigen (N protein or S glycoprotein at 3µg ml<sup>-1</sup> in PBS). Wells were washed with PBS-T (PBS with 0.05% Tween-20) and blocked with 5% milk in PBS-T for 1 hour at room temperature. Serial dilutions of heat-inactivated plasma (starting at 1:25, 6-fold dilution) were added to wells containing S and plasma at 1:25 dilution was added to wells containing N. Plasma was incubated for 2 hours at room temperature. Control reagents included CR3009 (2 µg ml<sup>-1</sup>) (N-specific monoclonal antibody), CR3022 (0.2 µg ml<sup>-1</sup>) (S-specific monoclonal antibody), negative control plasma (1:25 dilution), positive control plasma (1:50) and blank wells. Wells were incubated with secondary antibody for 1 hour at room temperature. IgG was detected using goat-anti-human-Fc-AP (alkaline phosphatase) (1:1,000) (Jackson). AP substrate (Sigma) was added, and plates read in duplicate at 405 nm. EC50 values were calculated in GraphPad Prism. Where an EC50 was not reached at 1:25, a plasma was considered seropositive if the OD at 405nm was 4-fold above background and a value of 25 was assigned.

To assess the functional impact of seroconversion, we measured the capacity of participants' plasma to neutralise both the prototypic (wild-type) strain of SARS-CoV-2 and the highly transmissible B.1.1.7 variant which contains nine (protein sequence) mutations in Spike. Pseudotyped HIV particles incorporating the SARS-CoV-2 Wuhan-Hu-1 Spike (hereafter referred to as wild-type [WT]) or B.1.1.7 variant Spike were prepared as previously described<sup>1</sup>. Serial dilutions of heat inactivated plasma samples were prepared in DMEM complete media (10% fetal bovine serum (FBS) and 1% Pen/Strep (100 IU/mL penicillin and 100 ug/mL streptomycin) and incubated with WT or B.1.1.7 pseudotyped virus for 1 hour at 37 °C in 96-well plates. HeLa cells stably expressing the ACE2 receptor (provided by Dr James Voss, Scripps Research, La Jolla, CA) were then added (12,500 cells/50µL per well) and the plates left for 72 hours. Infection level was assessed in lysed cells with the Bright-Glo luciferase kit (Promega), using a Victor™ X3 multilabel reader (Perkin Elmer). The ID<sub>50</sub> was calculated from duplicate measurements using GraphPad Prism.

### **Cellular immunogenicity assays**

PBMCs were frozen at -80°C in CS10 CryoStor following isolation from blood samples, before transfer to liquid nitrogen storage. Cryopreserved PBMCs from vaccinated individuals were thawed and viability assessed by trypan blue exclusion following a resting period, shown by others to facilitate a more accurate enumeration of cell viability and improved detection of antigen specific responses by cytokine ELISPOT. PBMC were stimulated with two separate SARS-CoV-2 spike protein peptide pools, one spanning the receptor binding domain containing S1 domain, and the other the S2 domain (PepMix SARS-CoV-2 spike pools 1+2 consisting of 158+157 15mer peptides spanning the S1 and S2 domain of the spike protein, JPT Peptide Technologies). These peptide pools are capable of stimulating both MHC-I and MHC-II restricted T cells with no particular HLA bias. PBMCs were also stimulated with CEF (CMV, EBV, influenza virus HLA class I epitopes) + CEFT (CMV, EBV, influenza

virus, tetanus toxoid HLA class II epitopes) + *Candida albicans* antigen (Greer Laboratories) as a positive control or DMSO, as a negative control.

All peptides were used at a final concentration of 0.25µg/ml/peptide and *Candida albicans* antigen at 0.5µg/ml. IFN $\gamma$ , IL-2, IL-17A/IL-22 responses were detected by a direct FluoroSpot assay and IL-21 was detected by a direct ELISPOT assay (MabTech, Sweden) according to the manufacturer's instructions. Briefly,  $2 \times 10^5$  PBMCs were transferred to wells of pre-coated FluoroSpot and ELISPOT plates and stimulated in duplicate for 46-48h with the stimuli described above. Cells were removed by washing, and antibody-bound cytokines identified using a cocktail of anti-IFN- $\gamma$ -BAM, anti-IL-2-WASP and anti-IL-17A/IL-22-biotinylated detection antibodies, followed by three fluorescent conjugates: anti-BAM (IFN- $\gamma$ ), anti-WASP (IL-17A) and Streptavidin-550 (IL-17A and IL-22) according to manufacturer's instructions. IL-21 was detected by a biotin-bound detection antibody followed by streptavidin-ALP. The substrate solution BCIP/NBT was added, and plates developed until well-defined spots emerged. Plates were scanned using AID *i*Spot Spectrum reader and analysed using AID EliSpot 8.0' software (AID Autoimmun Diagnostika). Data were analysed using a quality controlled standard operating procedure and values expressed as cytokine secreting cells/ $10^6$  PBMC following subtraction of values from negative control wells. Total response to SARS-CoV-2 spike protein was determined by summing responses to spike pools 1+2 to derive total spike specific T cell frequency. For every batch, a replicate cryopreserved PBMC sample from a single blood draw from a vaccinated control individual was included as a positive control. A threshold value of 30 cytokine secreting cells per million PBMCs was established, at which the total T cell response was classified as positive (Appendix Figure 4A).

## References

1. Monin, L. *et al.* Safety and immunogenicity of one versus two doses of the COVID-19 vaccine BNT162b2 for patients with cancer: interim analysis of a prospective observational study. *Lancet Oncol.* (2021) doi:10.1016/S1470-2045(21)00213-8.

## Section B: Supplementary Tables

**Table 1:** Baseline characteristics of study participants, disaggregated by sex.

|                                                                       | HV                  |                     | MTX                 |                     | TNF                 |                     | IL17                |                     | IL23                |                     | Total               |                     | P value           |
|-----------------------------------------------------------------------|---------------------|---------------------|---------------------|---------------------|---------------------|---------------------|---------------------|---------------------|---------------------|---------------------|---------------------|---------------------|-------------------|
| Number in each group                                                  | F (n=8)             | M (n=9)             | F (n=6)             | M (n=11)            | F (n= 14)           | M (n=13)            | F (n=7)             | M (n=8)             | F (n=10)            | M (n=15)            | F (n=45)            | M (n=56)            | 0.84 <sup>†</sup> |
| Age (year) <sup>†</sup>                                               | 26.0<br>(23.5-43.5) | 37.0<br>(29.0-46.0) | 52.0<br>(46.0-56.0) | 44.0<br>(39.0-57.0) | 36.0<br>(28.0-52.0) | 41.0<br>(28.0-51.0) | 39.0<br>(37.0-48.0) | 46.5<br>(40.5-51.0) | 41.0<br>(28.0-50.0) | 52.0<br>(33.0-60.0) | 39.0<br>(28.0-51.0) | 45.0<br>(33.0-53.0) | 0.053*            |
| BMI (mg/m2) <sup>†</sup>                                              | 23.5<br>(21.5-30.5) | 23.0<br>(21.4-29.2) | 29.4<br>(27.1-33.3) | 26.5<br>(26.3-28.1) | 28.9<br>(24.8-32.1) | 32.0<br>(28.7-40.1) | 26.3<br>(24.1-27.0) | 30.1<br>(26.6-32.8) | 29.0<br>(27.0-32.3) | 28.4<br>(26.5-34.0) | 27.9<br>(24.3-31.6) | 28.2<br>(26.3-33.3) | 0.032*            |
| Ethnicity, n (%)                                                      |                     |                     |                     |                     |                     |                     |                     |                     |                     |                     |                     |                     |                   |
| White                                                                 | 7 (88%)             | 7 (78%)             | 6 (100%)            | 7 (64%)             | 13 (93%)            | 11 (85%)            | 6 (86%)             | 7 (88%)             | 9 (90%)             | 12 (80%)            | 41 (91%)            | 44 (79%)            | 0.72*             |
| Black                                                                 | 0                   | 0                   | 0                   | 1 (9%)              | 0                   | 0                   | 0                   | 0                   | 0                   | 0                   | 0                   | 1 (2%)              |                   |
| South Asian                                                           | 1 (13)              | 2 (22.2%)           | 0                   | 3 (27%)             | 1 (7%)              | 2 (15%)             | 1 (14%)             | 1 (13)              | 1 (10%)             | 2 (13%)             | 4 (8.9%)            | 10 (18%)            |                   |
| Mixed                                                                 | 0                   | 0                   | 0                   | 0                   | 0                   | 0                   | 0                   | 0                   | 0                   | 1 (7%)              | 0                   | 1 (2%)              |                   |
| Disease severity measure (psoriasis area severity index) <sup>†</sup> | -                   | -                   | 2.4<br>(1.2-3.0)    | 2.2<br>(1.3-4.3)    | 0.9<br>(0.0-1.5)    | 1.5<br>(0.8-2.5)    | 0.0<br>(0.0-0.3)    | 1.6<br>(0.9-5.0)    | 1.8<br>(0.0-2.8)    | 1.2<br>(0.0-2.8)    | 0.9<br>(0.0-2.0)    | 1.8<br>(0.8-3.5)    | 0.11 <sup>†</sup> |
| Concomitant psoriatic arthritis, n (%)                                | -                   | -                   | 2 (33%)             | 0                   | 1 (7%)              | 4 (31%)             | 4 (57%)             | 4 (50%)             | 2 (20%)             | 3 (20%)             | 9 (20%)             | 11 (19%)            | 0.027*            |

All values are given as numbers (%) unless otherwise specified. <sup>†</sup> Median [IQR]. \*\* Total percentage of those with psoriasis.

Statistical imbalance of the baseline characteristics across the treatment groups presented by either kwallis or  $\chi^2$

HV, healthy volunteers; MTX, methotrexate; TNFi, TNF inhibitors; IL17i, IL-17 inhibitors; IL23i, IL-23 inhibitors.

**Table 2:** Adverse events, disaggregated by sex.

| Number in each group | HV      |         | MTX      |          | TNF       |          | IL17     |         | IL23     |          | Total    |          |
|----------------------|---------|---------|----------|----------|-----------|----------|----------|---------|----------|----------|----------|----------|
|                      | F (n=8) | M (n=9) | F (n=6)  | M (n=11) | F (n= 14) | M (n=13) | F (n=7)  | M (n=8) | F (n=10) | M (n=15) | F (n=45) | M (n=56) |
| Any Systemic Event   | 3 (38%) | 4 (44%) | 2 (33%)  | 3 (27%)  | 8 (62%)   | 6 (55%)  | 4 (57%)  | 3 (36%) | 6 (60%)  | 4 (27%)  | 23 (53%) | 20 (38%) |
| Chills               | 0 (0%)  | 1 (11%) | 0 (0%)   | 0 (0%)   | 0 (0%)    | 0 (0%)   | 1 (14%)  | 0 (0%)  | 2 (20%)  | 0 (0%)   | 3 (7%)   | 1 (2%)   |
| Fatigue              | 1 (13%) | 4 (44%) | 2 (33%)  | 1 (9%)   | 3 (23%)   | 3 (27%)  | 2 (27%)  | 2 (25%) | 3 (30%)  | 3 (21%)  | 11 (25%) | 13 (25%) |
| Fever                | 0 (0%)  | 0 (0%)  | 0 (0%)   | 0 (0%)   | 0 (0%)    | 0 (0%)   | 0 (0%)   | 0 (0%)  | 0 (0%)   | 0 (0%)   | 0 (0%)   | 1 (2%)   |
| Headache             | 2 (25%) | 1 (11%) | 1 (17%)  | 3 (27%)  | 4 (31%)   | 3 (27%)  | 2 (27%)  | 1 (13%) | 5 (50%)  | 1 (7%)   | 14 (32%) | 9 (17%)  |
| Malaise              | 1 (13%) | 2 (22%) | 0 (0%)   | 1 (9%)   | 2 (15%)   | 2 (18%)  | 1 (14%)  | 2 (25%) | 3 (30%)  | 1 (7%)   | 7 (16%)  | 8 (15%)  |
| Nausea               | 0 (0%)  | 0 (0%)  | 0 (0%)   | 0 (0%)   | 0 (0%)    | 1 (9%)   | 2 (27%)  | 2 (25%) | 2 (20%)  | 0 (0%)   | 0 (0%)   | 3 (6%)   |
| Any local Event      | 7 (88%) | 8 (89%) | 6 (100%) | 6 (55%)  | 9 (69%)   | 8 (73%)  | 7 (100%) | 6 (75%) | 8 (80%)  | 10 (71%) | 37 (84%) | 38 (72%) |
| Induration           | 0 (0%)  | 0 (0%)  | 0 (0%)   | 0 (0%)   | 0 (0%)    | 0 (0%)   | 0 (0%)   | 0 (0%)  | 0 (0%)   | 1 (7%)   | 0 (0%)   | 1 (2%)   |
| Itch                 | 0 (0%)  | 0 (0%)  | 1 (17%)  | 0 (0%)   | 0 (0%)    | 0 (0%)   | 0 (0%)   | 0 (0%)  | 0 (0%)   | 0 (0%)   | 2 (5%)   | 0 (0%)   |
| Pain                 | 7 (88%) | 7 (78%) | 5 (83%)  | 6 (55%)  | 8 (62%)   | 8 (73%)  | 7 (100%) | 5 (63%) | 7 (70%)  | 9 (64%)  | 34 (77%) | 35 (66%) |
| Redness              | 0 (0%)  | 0 (0%)  | 0 (0%)   | 0 (0%)   | 1 (8%)    | 0 (0%)   | 0 (0%)   | 0 (0%)  | 1 (10%)  | 0 (0%)   | 0 (0%)   | 0 (0%)   |
| Swelling             | 0 (0%)  | 0 (0%)  | 0 (0%)   | 0 (0%)   | 0 (0%)    | 0 (0%)   | 0 (0%)   | 0 (0%)  | 1 (10%)  | 0 (0%)   | 0 (0%)   | 0 (0%)   |
| Tender               | 5 (63%) | 7 (78%) | 6 (100%) | 4 (36%)  | 4 (31%)   | 6 (55%)  | 2 (27%)  | 3 (36%) | 7 (70%)  | 4 (27%)  | 24 (55%) | 24 (45%) |
| Warmth               | 0 (0%)  | 0 (0%)  | 0 (0%)   | 0 (0%)   | 0 (0%)    | 0 (0%)   | 0 (0%)   | 0 (0%)  | 0 (0%)   | 0 (0%)   | 0 (0%)   | 0 (0%)   |

**Section C: Supplementary Figures**

**Appendix Figure 1:** Local and systemic adverse events reported within 28 days after the COVID-19 vaccine BNT162b2.

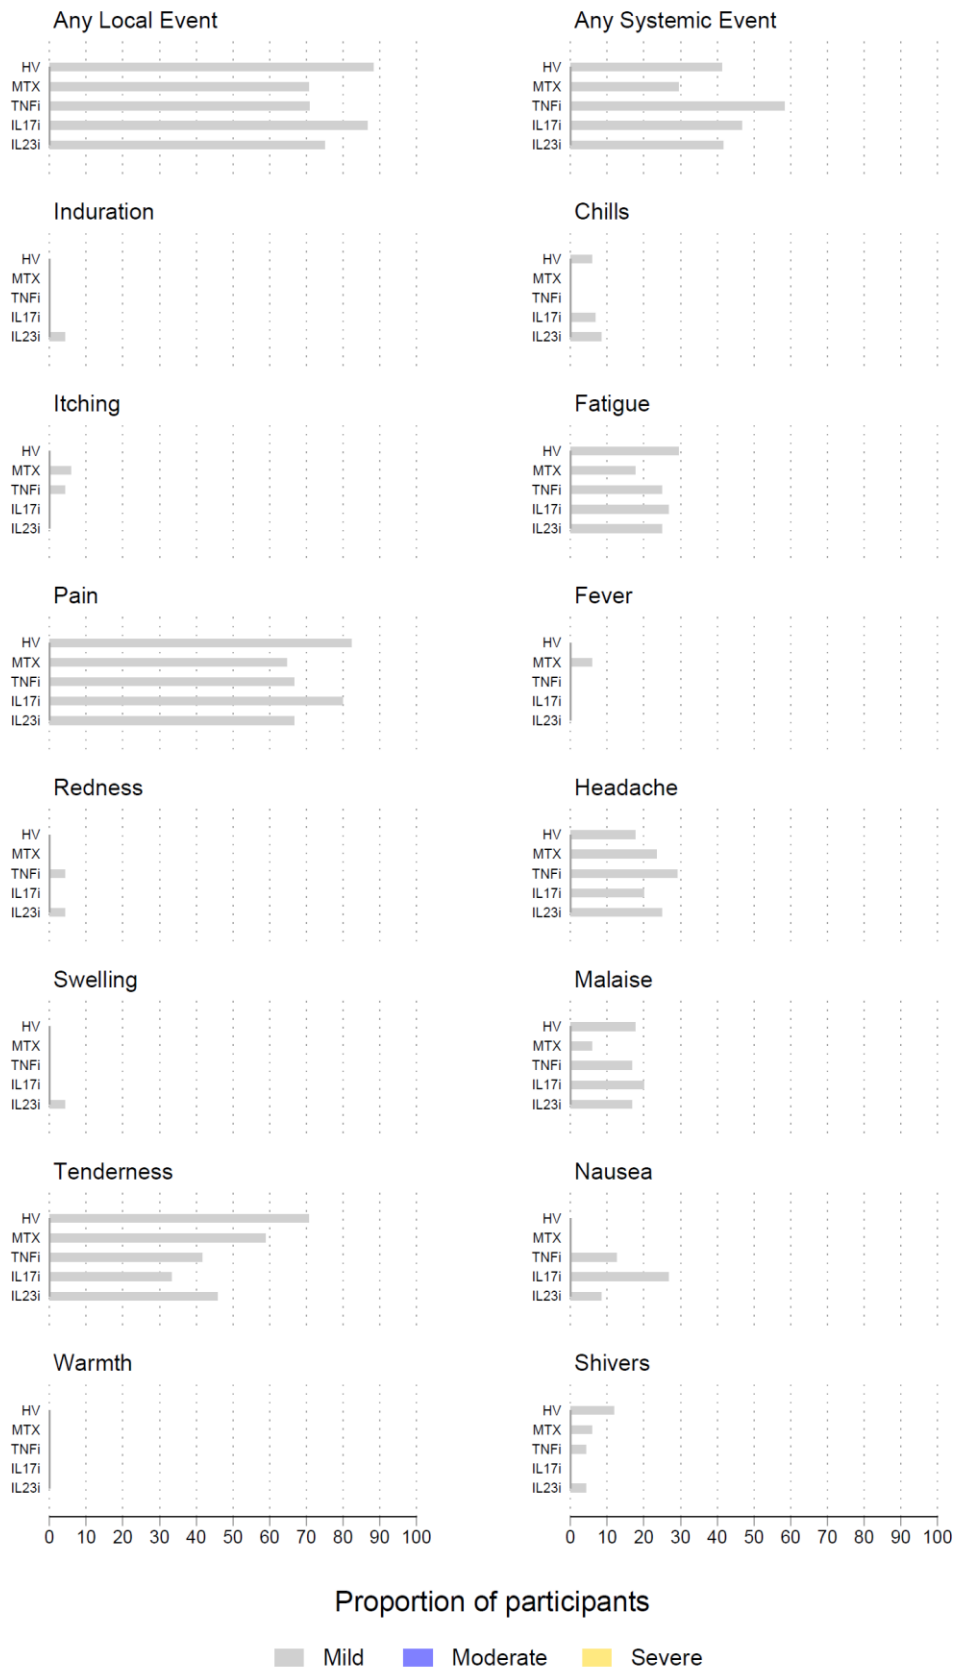

Percentage of participants in each study group reporting local and systemic adverse events following the first dose of BNT162b2 vaccine. Symptoms were assessed according to the following scale: mild (no/minimal interference with activity and no/minimal medical intervention required), moderate (limitation in activity and medical intervention required), and severe (marked limitation in activity and medical intervention required). HV, healthy volunteers; MTX, methotrexate; TNFi, TNF inhibitors; IL17i, IL-17 inhibitors; IL23i, IL-23 inhibitors.



**Appendix Figure 2: Serological data on study participants at day 0 and 28 following COVID-19 vaccine BNT162b2.**

**Figure 2A.** IgG titres to Nucleoprotein (N) at Day 0 and Day 28 following the first dose of COVID-19 vaccine BNT162b2.

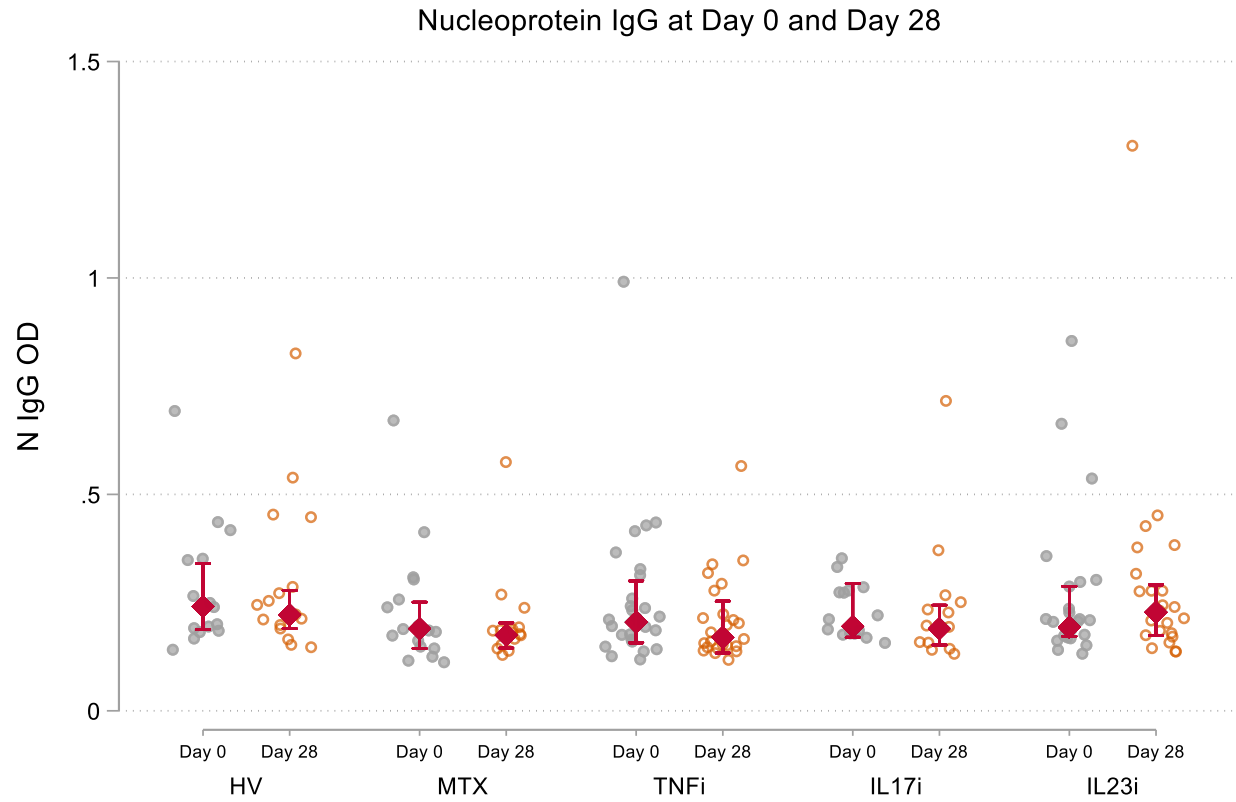

The circles represent individual values. The red diamonds and range lines indicate the median and interquartile range (IQR). HV, healthy volunteers; MTX, methotrexate; TNFi, TNF inhibitors; IL17i, IL-17 inhibitors; IL23i, IL-23 inhibitors. Absorbance (405nm).

**Figure 2B.** Spike-specific IgG at Day 0 and Day 28 following the first dose of COVID-19 vaccine BNT162b2

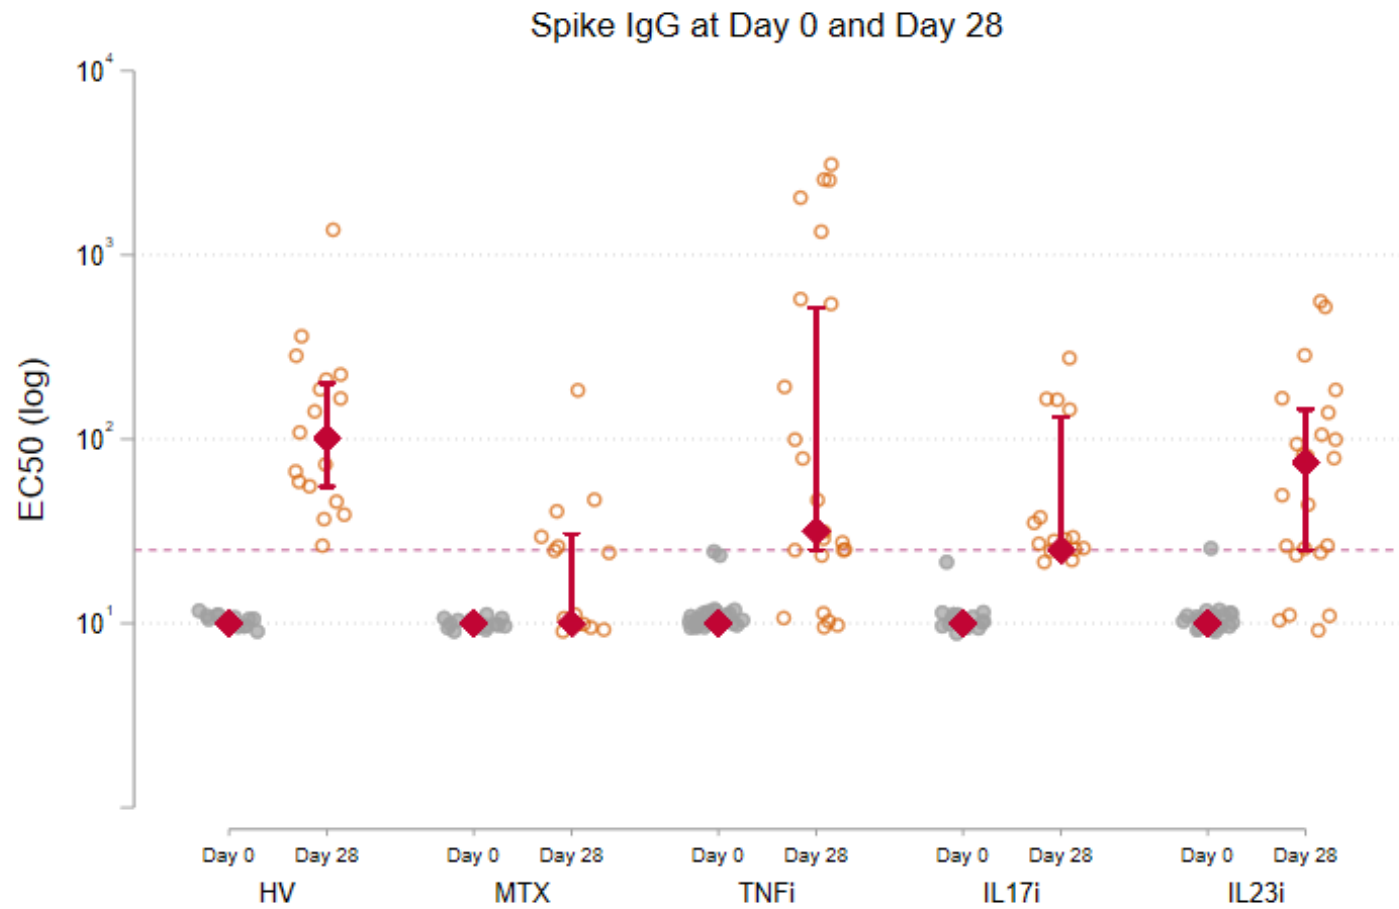

The circles represent individual values. The red diamonds and range lines indicate the median and interquartile range (IQR). HV, healthy volunteers; MTX, methotrexate; TNFi, TNF inhibitors; IL17i, IL-17 inhibitors; IL23i, IL-23 inhibitors.

Appendix Figure 3: Correlation between neutralization titres against WT and B.1.1.7 SARS-CoV-2 variants

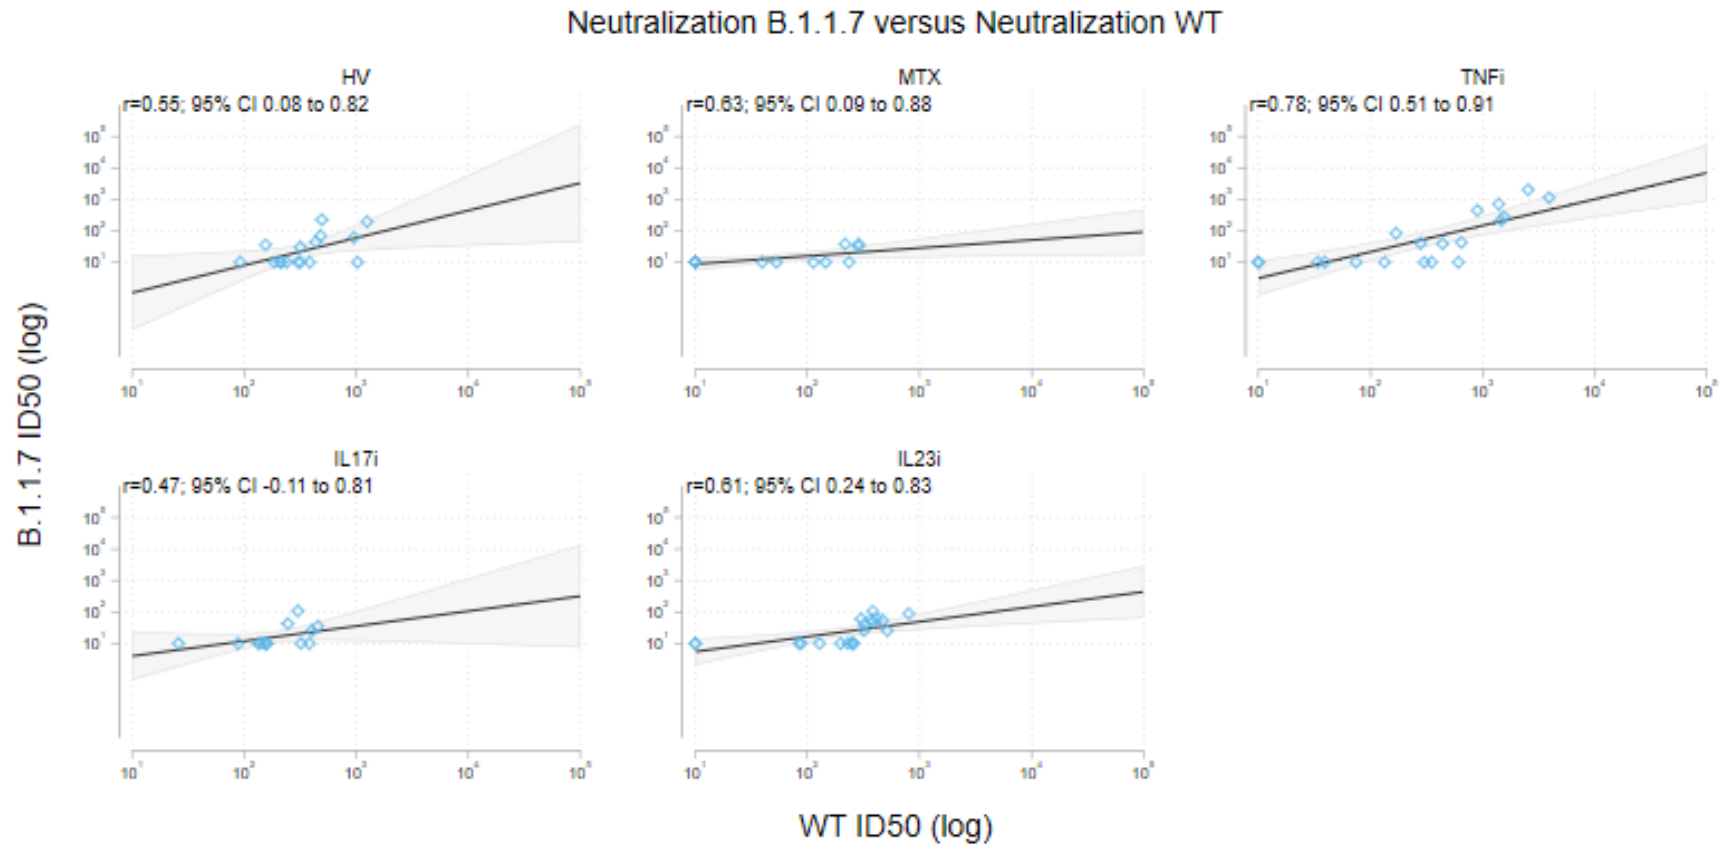

The diamonds represent individual values. N: total number individuals; r: rho by Pearson's correlation; 95 CI: 95% confidence interval. HV, healthy volunteers; MTX, methotrexate; TNFi, TNF inhibitors; IL17i, IL-17 inhibitors; IL23i, IL-23 inhibitors

**Appendix Figure 4: QC and T cell responses to COVID-19 vaccine BNT162b2.**

Figure 4A. Determining a cut-off value for assigning positive and negative cellular responses.

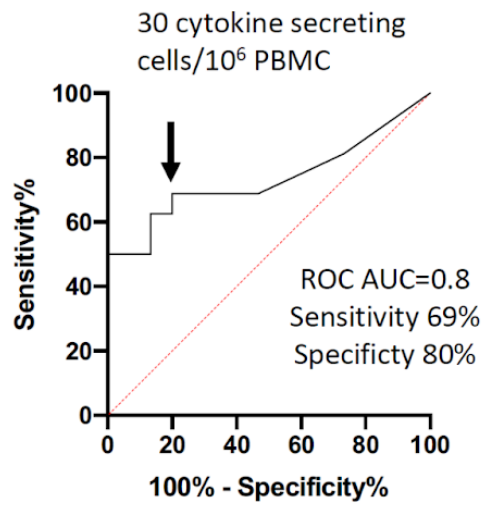

Graph represents a ROC plot showing assay diagnostic sensitivity against specificity (one minus proportion of false positives) following detection of summed IFN-, IL-2 and IL21 responses to Spike peptide pools in healthy control subjects before and following one dose of BNT162b2. By convention, we selected the cut-off value that provides an operating position nearest to that of the “perfect test” (i.e., closest approximation to 100% sensitivity and 100% specificity), which was  $\geq 30$  cytokine secreting cells/10<sup>6</sup> PBMC

**Figure 4B.** Positive control T cell responses to peptides derived from commonly encountered viruses and fungal antigens

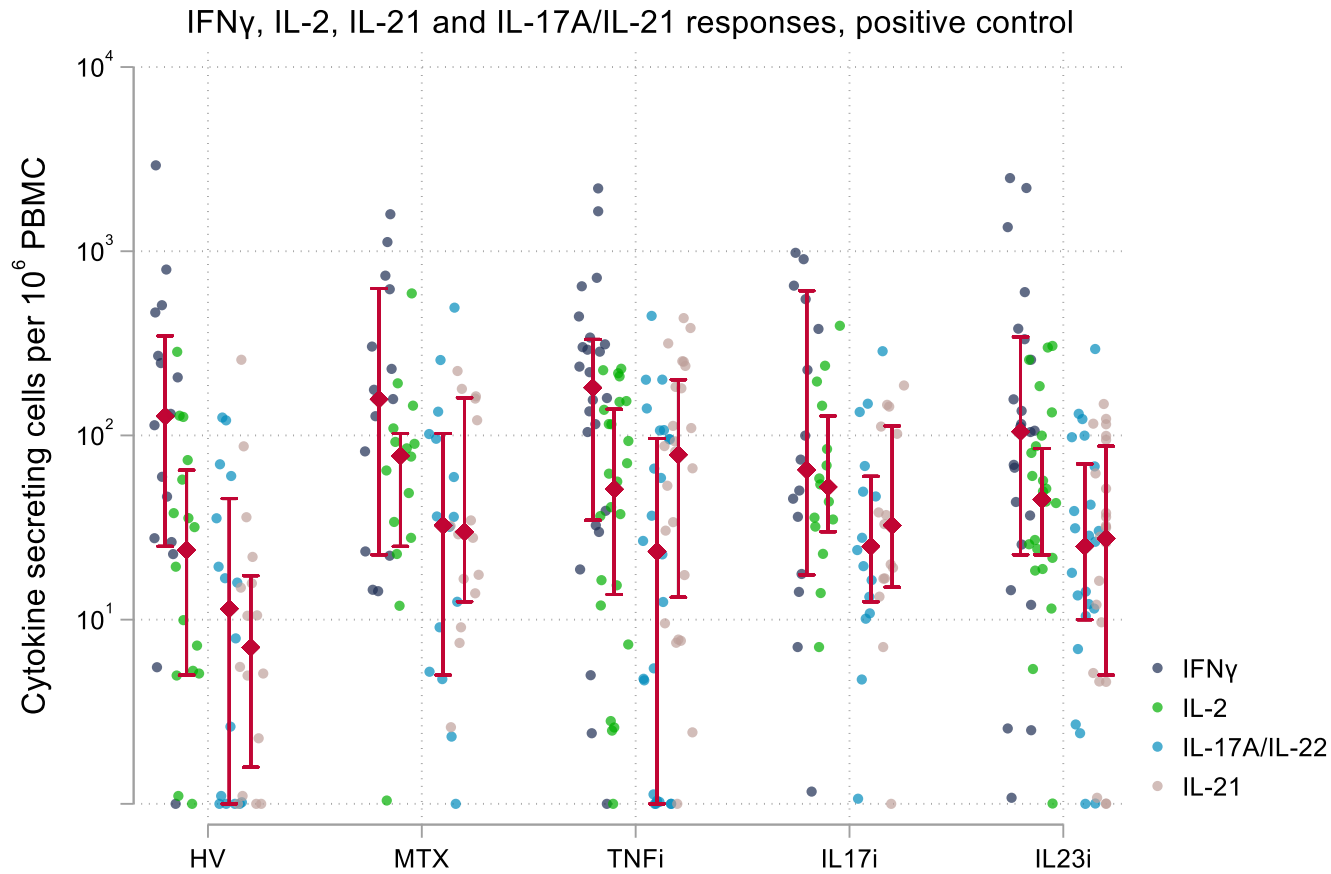

The positive control stimulus was CEF (CMV, EBV, influenza virus HLA class I epitopes) + CEFT (CMV, EBV, influenza virus, tetanus toxoid HLA class II epitopes) + *Candida albicans* antigen (Greer Laboratories). HV, healthy volunteers; MTX, methotrexate; TNFi, TNF inhibitors; IL17i, IL-17 inhibitors; IL23i, IL-23 inhibitors. The circles represent individual values. The red diamonds and range lines indicate the median and interquartile range (IQR).

**Figure 4C.** T cell response to negative control (DMSO), Spike pool 1 (S1) and Spike pool 2 (S2) as determined by IFN $\gamma$  and/or IL-2 and/or IL-21 responses reported as number of cytokine secreting cells per  $10^6$  cells in PBMC.

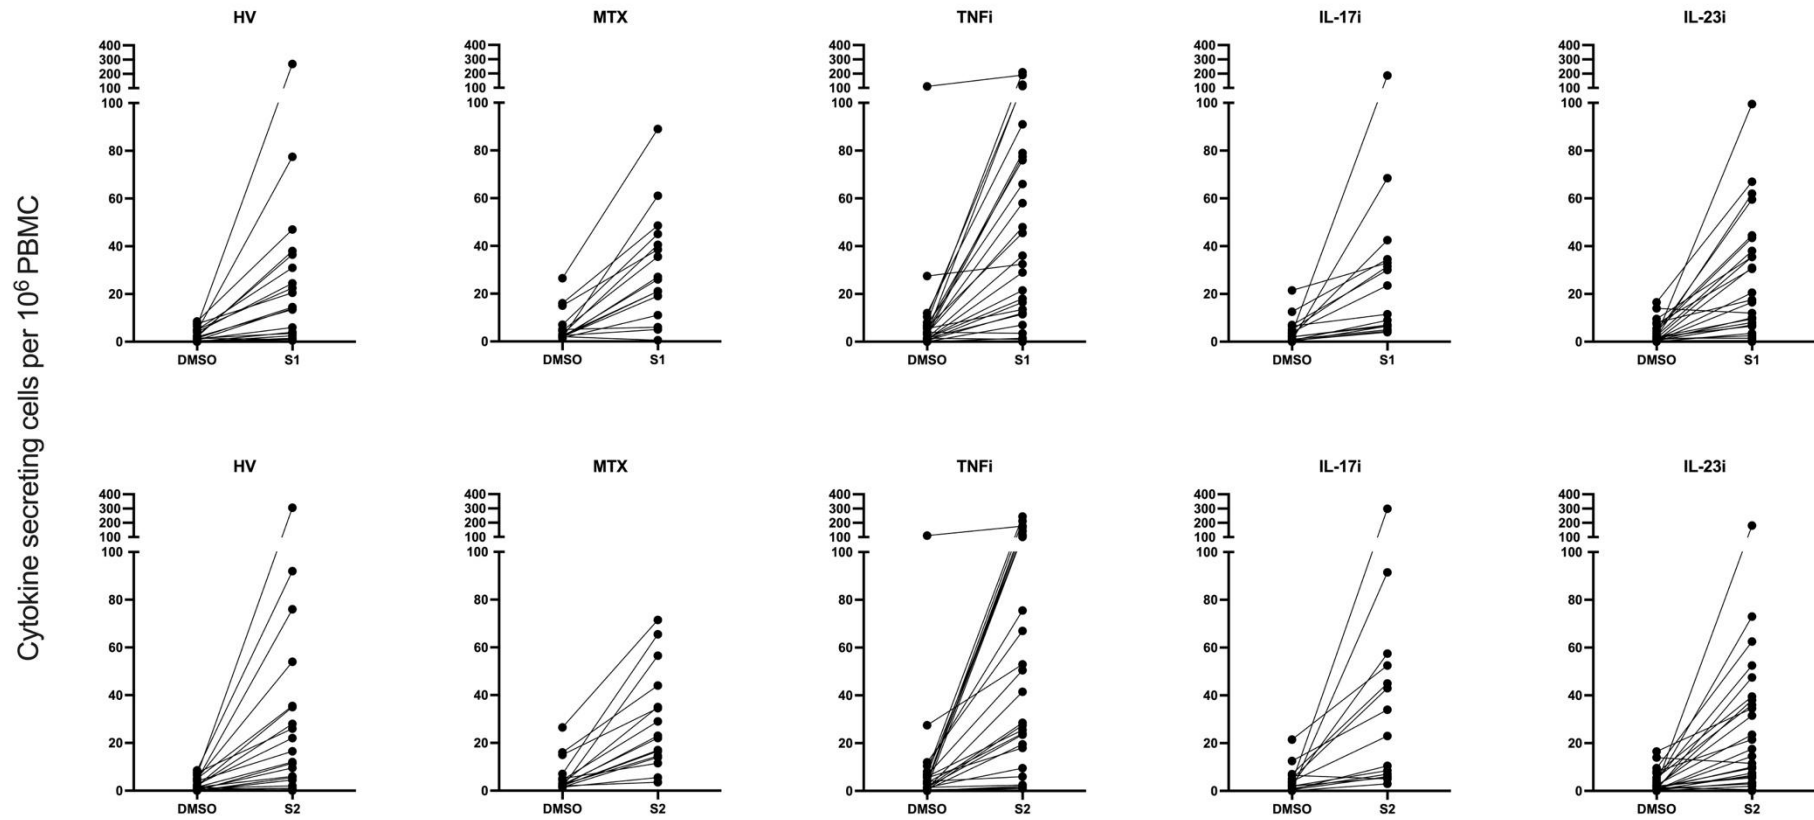

The circles represent individual values, lines join responses from the same individual

**Figure 4D.** Individual cytokine responses to the first dose of COVID-19 vaccine BNT162b2.

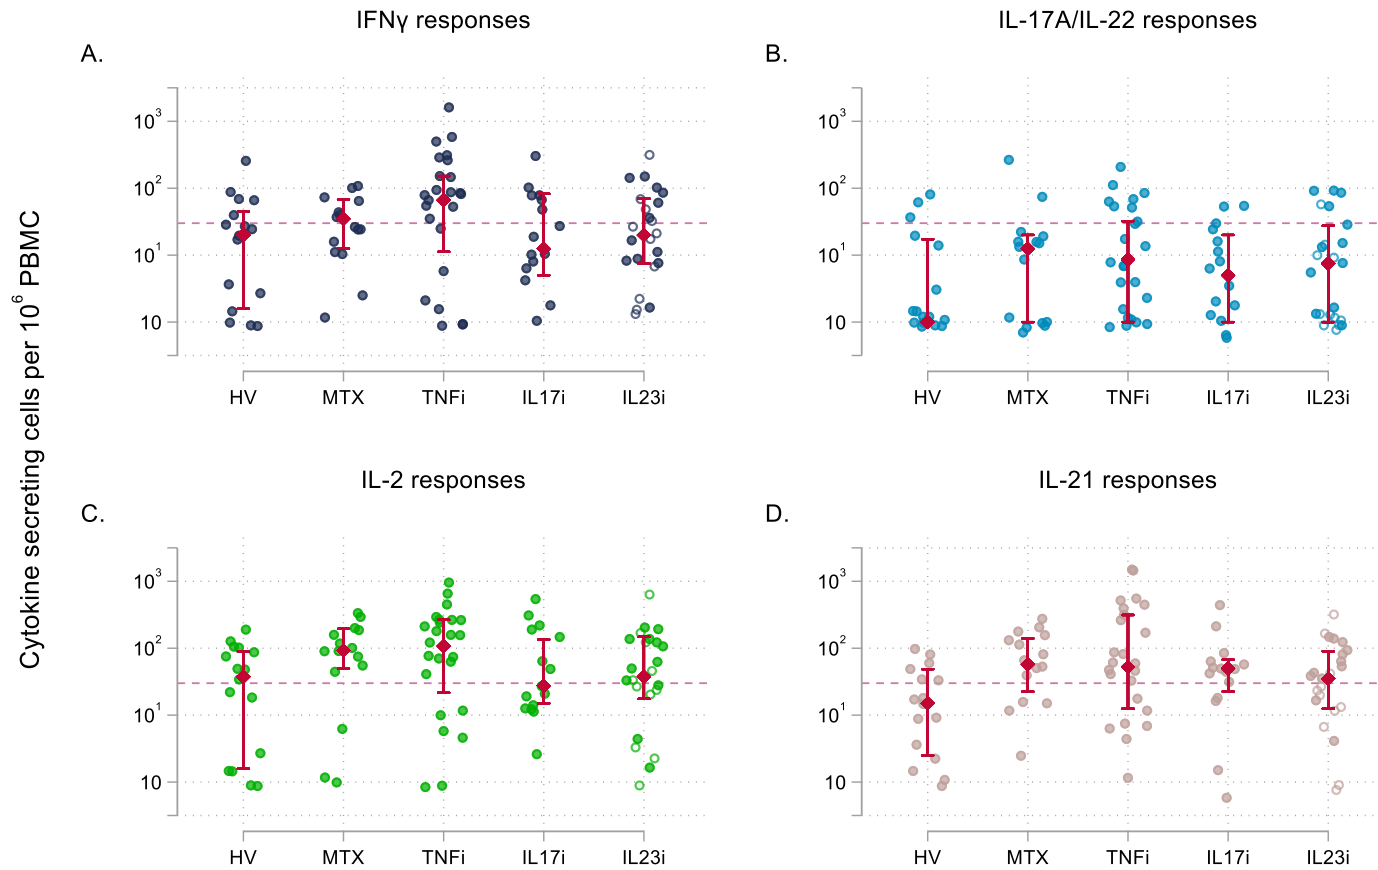

The circles represent individual values. The red diamonds and range lines indicate the median and interquartile range (IQR). In the IL23i group, filled circles represent participants receiving IL-23p19 inhibitors and hollow circles represent participants receiving IL-23p40/IL-12 inhibition. Horizontal line indicates T cell response threshold. HV, healthy volunteers; MTX, methotrexate; TNFi, TNF inhibitors; IL17i, IL-17 inhibitors; IL23i, IL-23 inhibitors.

**Figure 4E.** Correlations between humoral and immunogenicity assays.

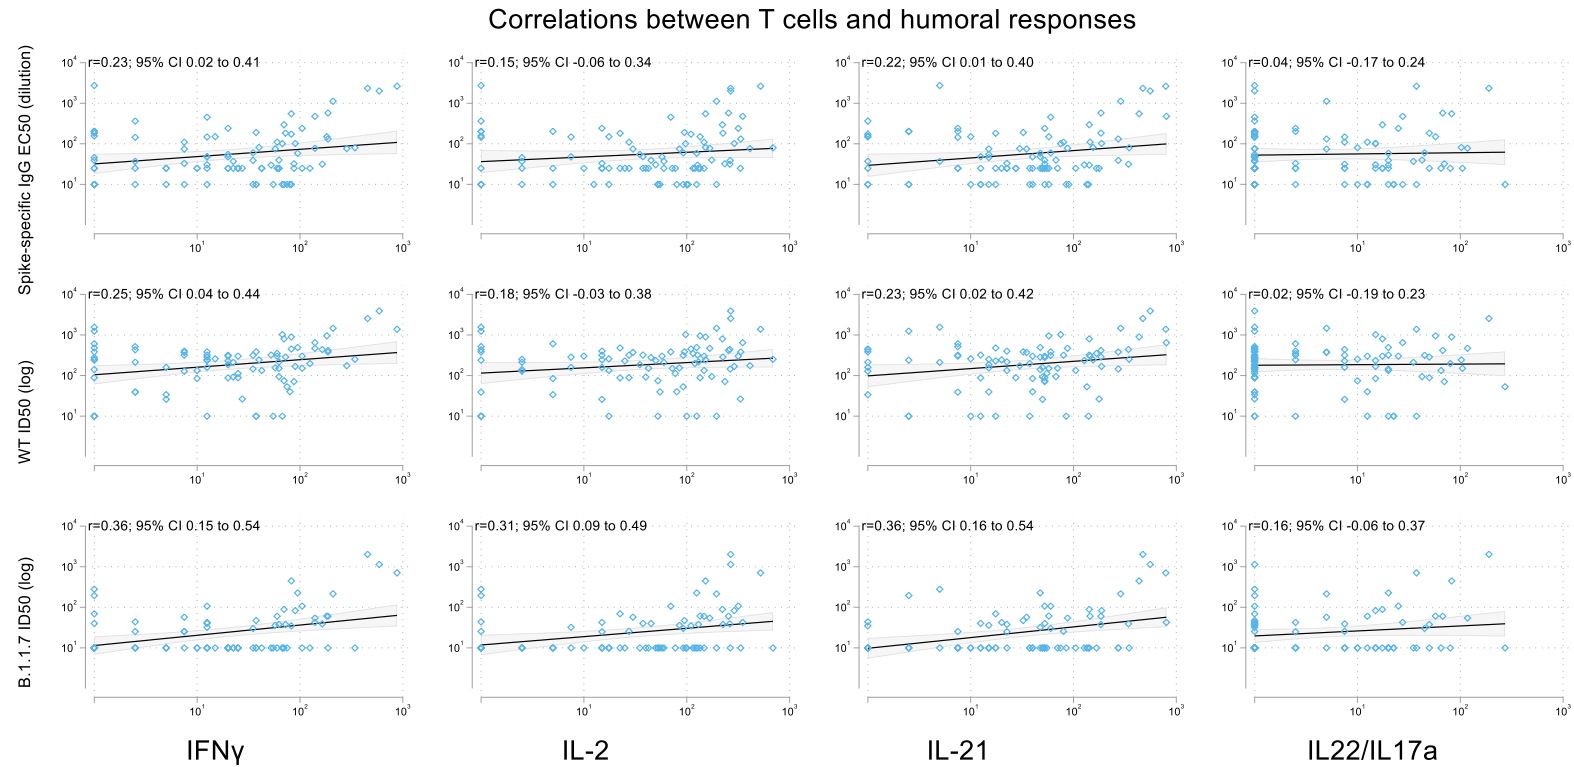

The diamonds represent individual values. n: total number individuals; r: rho by Pearson's correlation; 95% CI: 95% confidence interval.



**Appendix Figure 5: Humoral and cellular immunogenicity of the first dose of COVID-19 vaccine BNT162b2 in patients with prior SARS-CoV-2 infection receiving therapeutic immunosuppression, in comparison to the (infection-naïve) whole study cohort**

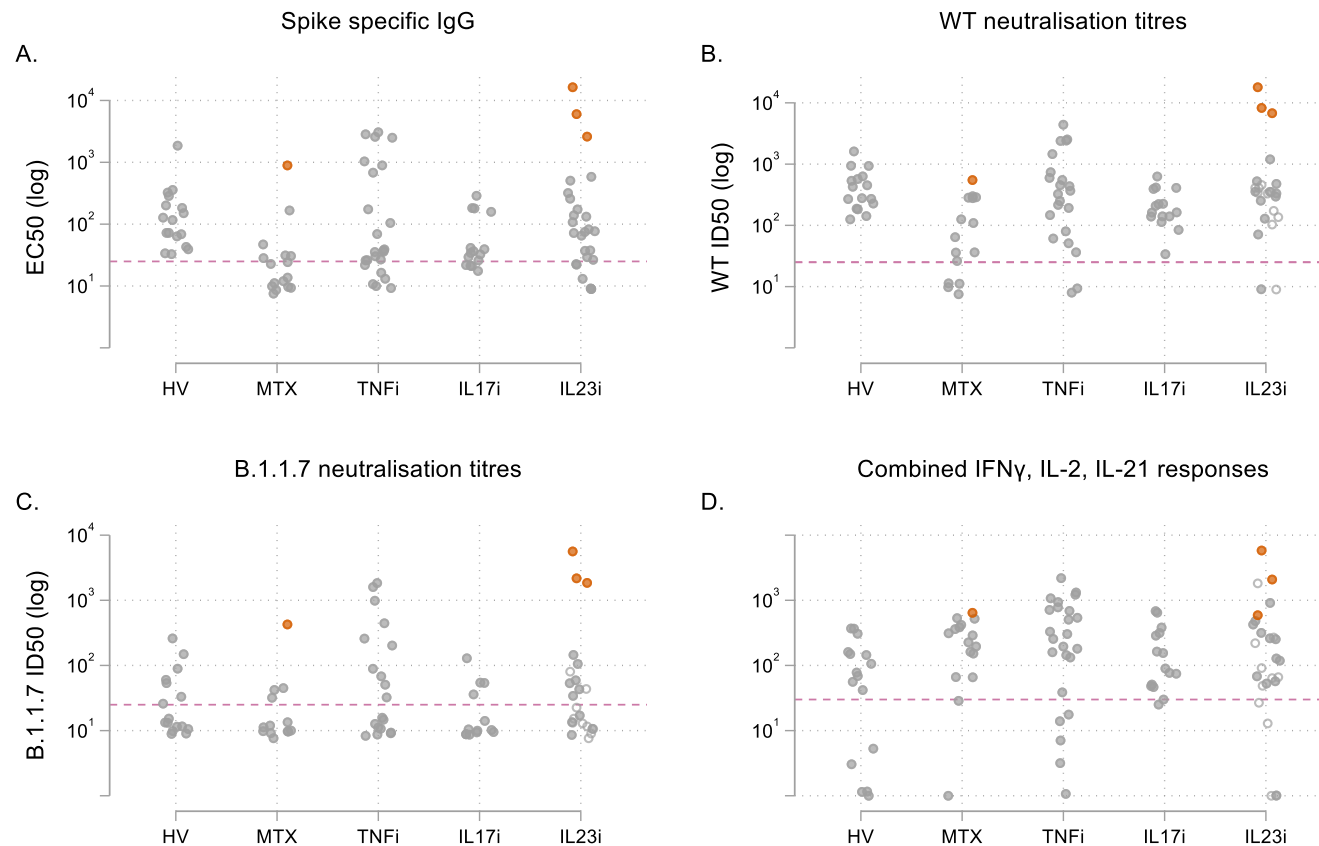

A. Serologic immune responses to the first dose of COVID-19 vaccine BNT162b2. B. Neutralization titres against WT SARS-CoV-2. C. Neutralization titres against B.1.1.7 SARS-CoV-2 variant. D. Total T cell response, as determined by IFN $\gamma$  and/or IL-2 and/or IL-21 cellular responses.

The circles represent individual values. Orange circles represent participants with prior SARS-CoV-2 infection. Grey circles represent the whole study (infection-naïve) cohort. In the IL23i group, filled grey circles represent infection-naïve participants receiving IL-23p19 inhibitors and hollow grey circles represent participants receiving IL-23p40/IL-12 inhibition. Horizontal line indicates seroconversion, neutralising activity or T cell response thresholds, as appropriate. HV, healthy volunteers; MTX, methotrexate; TNFi, TNF inhibitors; IL17i, IL-17 inhibitors; IL23i, IL-23 inhibitors.
